# Supplementary material for: Cu, Zn-coordinated ZIF-derived bimetal N-doped carbon frameworks for aerobic alcohol oxidation
Source: Royal Society of Chemistry journal article supplement (doi:10.1039/d3nj01507f), 2023-01-01
Supplement: d3nj01507f1.pdf [file d3nj01507f1.pdf]

**Cu, Zn-coordinated ZIF-derived bimetal N-doped carbon framework for aerobic alcohol  
oxidation**

Wenjie Du, Xiaohui Sun, Kezhi Tang, Limei Wang, Zhuyin Sui, Yulin Li\*, Xiufeng Xu\*

*School of Chemistry and Chemical Engineering, Yantai University, Yantai 264005, Shandong,*

*China*

\*Corresponding author.

E-mail address: liyulin@ytu.edu.cn (Y. Li), xxf@ytu.edu.cn (X. Xu).

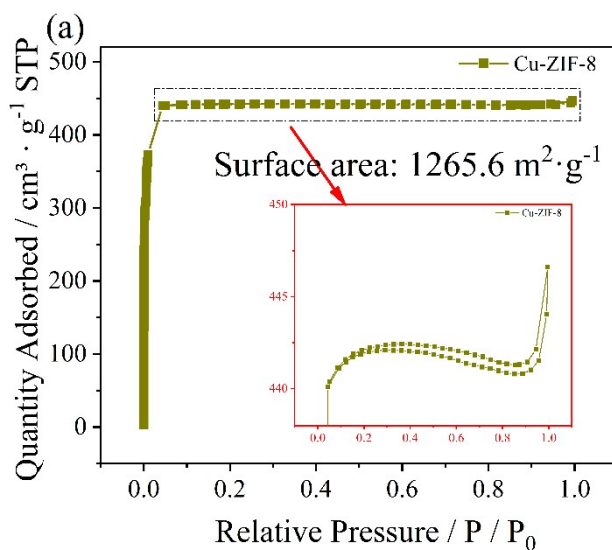

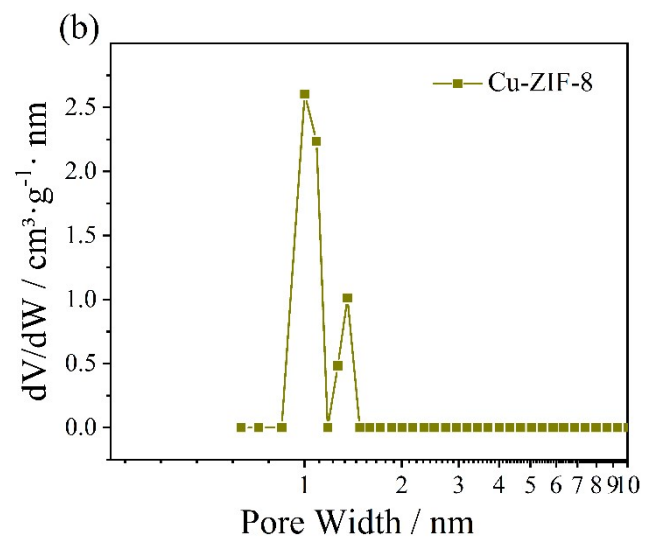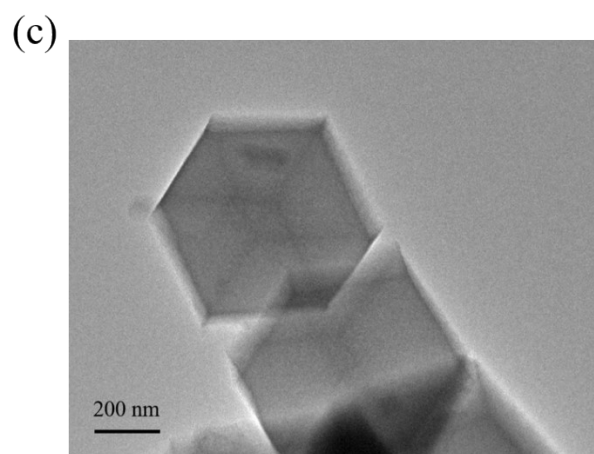

**Fig. S1** (a) N<sub>2</sub> sorption isotherms, (b) the pore size distribution and (c) SEM image of the Cu-ZIF

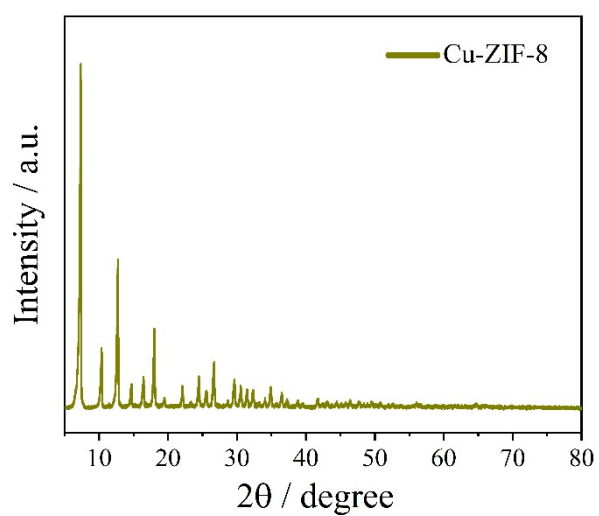

**Fig. S2** XRD pattern of the Cu-ZIF

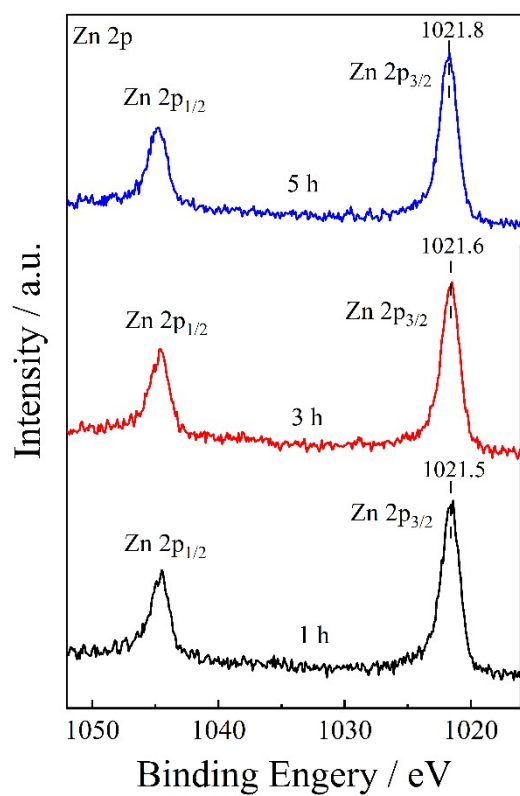

**Fig. S3** XPS spectra of Zn 2p at different reaction times

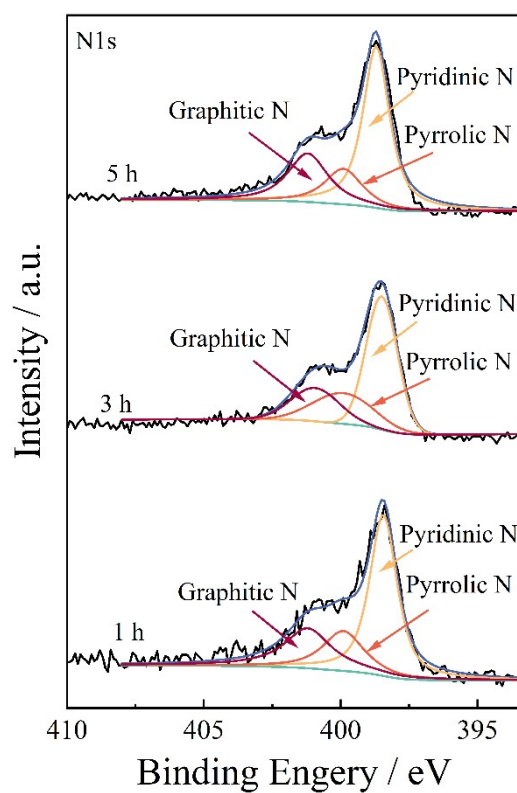

**Fig. S4** XPS spectra of N1s at different reaction times

**Table S1** Surface atomic ratio of the N1s at different reaction times over the Zn-N-C-800 catalyst

| Sample | N%          |            |             |
|--------|-------------|------------|-------------|
|        | Pyridinic N | Pyrrolic N | Graphitic N |
| 1 h    | 58.1        | 20.2       | 21.7        |
| 3 h    | 54.5        | 24.2       | 21.3        |
| 5 h    | 54.2        | 20.8       | 25.0        |

**Table S2** Catalytic performance at respective temperatures and solvent for selected representative benzyl alcohol oxidation systems

| Catalyst                                         | Solvent | Temperature / °C | Time / h | Con. / % | Sel. / % | Refs.     |
|--------------------------------------------------|---------|------------------|----------|----------|----------|-----------|
| Ag@Au/ZIF-8                                      | THF     | 130              | 1        | 75       | 53       | [1]       |
| Pd/MagSBA                                        | ---     | 85               | 9        | 85       | 83       | [2]       |
| MnO <sub>2</sub> @MF                             | Hexane  | 70               | 4        | 40       | 100      | [3]       |
| PtBi/CNT                                         | Water   | 75               | 3        | 55       | 90       | [4]       |
| Co <sub>3</sub> O <sub>4</sub> /MnO <sub>2</sub> | Toluene | 100              | 6        | 81       | 90       | [5]       |
| Au-Pd/TiO <sub>2</sub>                           | ---     | 90               | 6        | 95       | 74       | [6]       |
| CuNi/C                                           | THF     | 100              | 4        | 64       | 54       | [7]       |
| Mn <sub>6</sub> Ni <sub>4</sub>                  | Toluene | 100              | 1        | 89       | 99       | [8]       |
| Cu-Zn-N-C-800                                    | Toluene | 50               | 3        | 95       | 84       | This work |

## References

- 1 L.L. Liu, X.J. Zhou, Y.M. Yan, J. Zhou, W.P. Zhang, X.S. Tai, *Polymers*, 10 (2018) 1-16.
- 2 Y.Y. Li, J.L. Huang, X.J. Hu, F.L.Y. Lam, W.J. Wang, R. Luque, *J. Mol. Catal. A-Chem.*, 425 (2016) 61-67.
- 3 G. Elmaci, D. Ozer, B. Zumreoglu-Karan, *Catal. Commun.*, 89 (2017) 56-59.
- 4 C.M. Zhou, Z. Guo, Y.H. Dai, X.L. Jia, H. Yu, Y.H. Yang, *Appl. Catal. B-Environ.*, 181 (2016) 118-126.
- 5 V.G. Reddy, D. Jampaiah, A. Chalkidis, Y.M. Sabri, E.L.H. Mayes, S.K. Bhargava, *Catal. Commun.*, 130 (2019) 1-5.
- 6 Y.L. Hong, X.L. Jing, J.L. Huang, D.H. Sun, T. Odoom-Wubah, F. Yang, M.M. Du, Q.B. Li, *ACS Sus. Chem. Eng.*, 2 (2014) 1752-1759.
- 7 L.L. Liu, X.J. Zhou, L. Liu, S. Jiang, Y.J. Li, L.X. Guo, S.J. Yan, X.S. Tai, *Catalysts*, 9 (2019) 1-18.

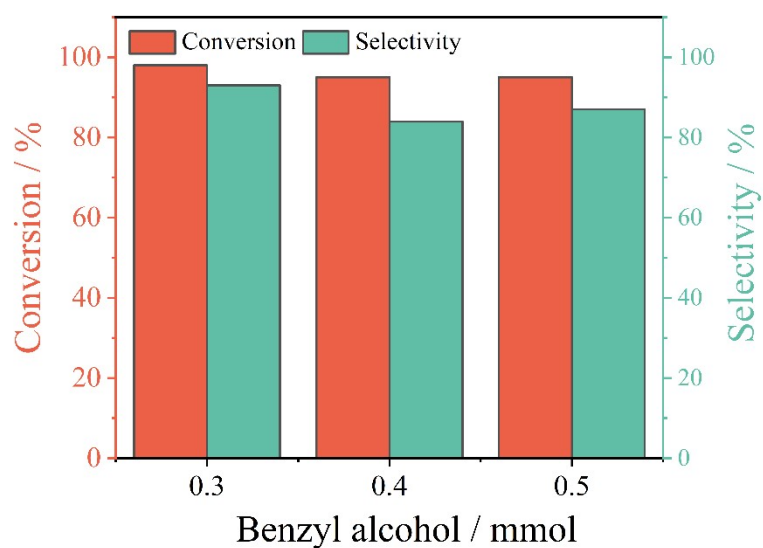

**Fig. S5** Effect of benzyl alcohol concentration on catalytic performance.

**Table S3** Catalytic activity of prepared catalyst.<sup>a</sup>

| Catalyst   | Amount of catalyst / g | Con. / % | Sel. / % | TOF / h <sup>-1</sup> <sup>b</sup> |
|------------|------------------------|----------|----------|------------------------------------|
| Zn-N-C-700 | 0.02                   | 5.7      | 76       | 2.01                               |
| Zn-N-C-800 | 0.02                   | 8.6      | 62       | 6.54                               |

|               |       |     |    |      |
|---------------|-------|-----|----|------|
| Zn-N-C-900    | 0.015 | 2.6 | 99 | 6.01 |
| Cu-Zn-N-C-800 | 0.012 | 5.5 | 99 | 7.08 |

<sup>a</sup> Reaction conditions: 0.4 mmol benzyl alcohol, 10 mL toluene, O<sub>2</sub> flow rate 30 mL/min, 70 °C, 1h.

<sup>b</sup> Calculated based on the total amount of metal.

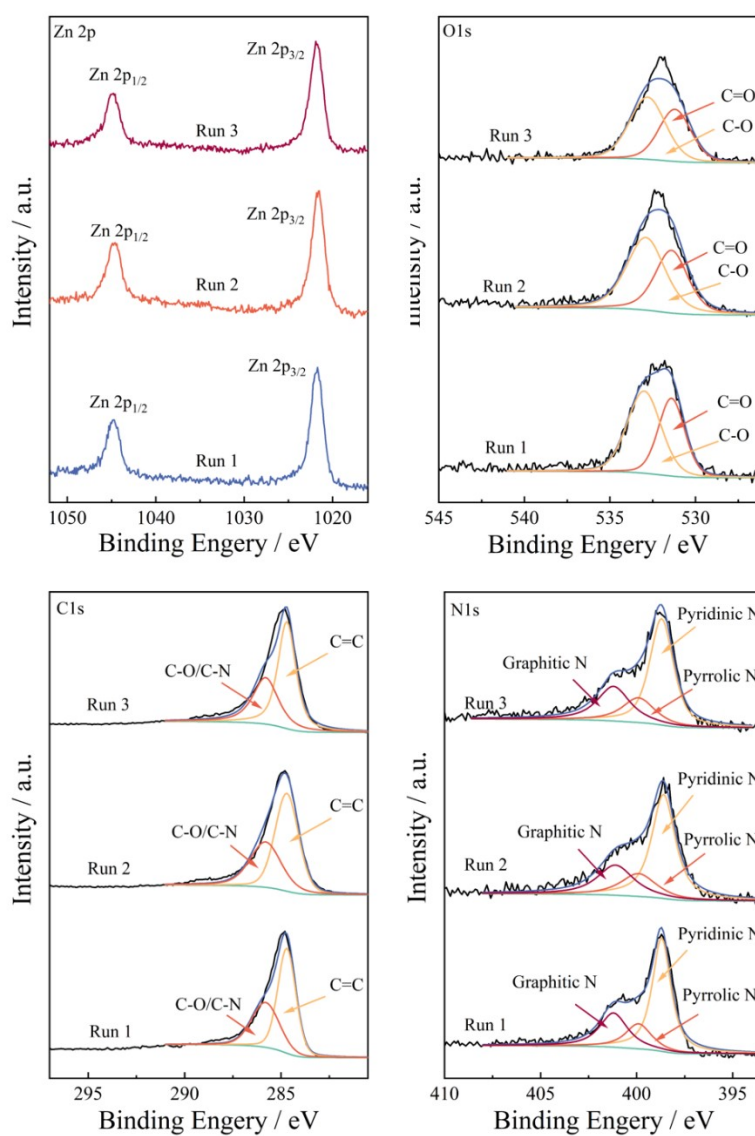

**Fig. S6** XPS spectra of Zn-N-C-800 catalyst for different reaction cycles

**Table S4** Surface atomic ratio of the catalyst as estimated by XPS.

| Sample | C%   |         | N%          |            |             | O%   |      |
|--------|------|---------|-------------|------------|-------------|------|------|
|        | C=C  | C-O/C-N | Pyridinic N | Pyrrolic N | Graphitic N | C=O  | C-O  |
| Run 1  | 60.4 | 39.6    | 54.2        | 20.8       | 25.0        | 42.5 | 57.5 |
| Run 2  | 59.8 | 40.2    | 54.7        | 20.7       | 24.6        | 42.4 | 57.6 |
| Run 3  | 60.8 | 39.2    | 54.0        | 20.8       | 25.2        | 42.9 | 57.1 |
